# Supplementary material for: Post‐COVID‐19 condition in the German working population: A cross‐sectional study of 200,000 registered stem cell donors
Source: PubMed Central journal article supplement — J Intern Med. 2022 Dec 18;293(3):354–70. doi: 10.1111/joim.13587 (PMC10107314; doi:10.1111/joim.13587), 2022-12-18
Supplement: JOIM-293-354-s002.pdf [file JOIM-293-354-s002.pdf]

# Supplements

## Supplemental Figures

### Fragenblock - Risikofaktoren

- Nehmen Sie regelmäßig Medikamente gegen hohen Blutdruck ein?
- Ja
  - Nein
- Nehmen Sie regelmäßig Medikamente gegen eine Zuckerkrankheit ein?
- Ja
  - Nein
- Rauchen Sie regelmäßig (täglich 1 Zigarette oder mehr)?
- Nein, ich habe noch nie geraucht.
  - Nein, aber ich habe früher (vor 2019) regelmäßig geraucht.
  - Ja, ich rauche regelmäßig.
  - Ich rauche gelegentlich, aber nicht täglich.
- Bitte geben Sie Ihr Gewicht in vollen kg an.
- Bitte geben Sie Ihre Körpergröße in vollen cm an.
- Wie bewerten Sie Ihre körperliche Fitness im Vergleich zu der Zeit vor der Pandemie (März 2020)?
- Viel besser
  - etwas besser
  - ungefähr gleich
  - etwas schlechter
  - viel schlechter
- Wie bewerten Sie Ihre Konzentrationsfähigkeit und geistige Leistungsfähigkeit im Vergleich zu der Zeit vor der Pandemie (März 2020)?
- Viel besser
  - etwas besser
  - ungefähr gleich
  - etwas schlechter
  - viel schlechter
- Wie häufig hatten Sie die folgenden Symptome in den letzten 2 Wochen?

| Symptom                                               | Fast Täglich | Gelegentlich | Nie |
|-------------------------------------------------------|--------------|--------------|-----|
| Müdigkeit/Erschöpfung                                 |              |              |     |
| Durchfall                                             |              |              |     |
| Geschmacks- und/oder Geruchsverlust                   |              |              |     |
| Atemnot                                               |              |              |     |
| Schwindel                                             |              |              |     |
| Schlafprobleme                                        |              |              |     |
| Kopfschmerzen                                         |              |              |     |
| Übelkeit/Erbrechen                                    |              |              |     |
| Kein Appetit                                          |              |              |     |
| Halschmerzen                                          |              |              |     |
| Brustschmerzen                                        |              |              |     |
| Sorgen/Ängste                                         |              |              |     |
| Gedächtnisstörungen                                   |              |              |     |
| Muskelschmerzen                                       |              |              |     |
| Gelenkschmerzen                                       |              |              |     |
| Bauchschmerzen                                        |              |              |     |
| Husten                                                |              |              |     |
| Herzrasen/ „Herzklopfen“                              |              |              |     |
| Niedriggeschwindigkeit/ sich nicht mehr freuen können |              |              |     |
| Konzentrationsstörungen                               |              |              |     |

- Wurden Sie bereits gegen COVID-19 geimpft?
- Nein
  - Ja
- 1. Impfung**  
[Monat, Jahr]
- Impfstoff
- BioNTech-Pfizer
  - AstraZeneca
  - Moderna
  - Johnson&Johnson
  - unbekannt
- 2. Impfung**
- keine 2. Impfung vorgesehen
  - 2. Impfung nicht erhalten
- [Monat, Jahr]
- Impfstoff
- BioNTech-Pfizer
  - AstraZeneca
  - Moderna
  - Johnson&Johnson
  - unbekannt
- Wurden Sie mindestens 1x positiv auf eine Infektion mit dem Corona-Virus getestet?
- Ja
  - Nein [Sprung Ende]
- Erfolgte dieser Nachweis mit einem PCR-Test?
- Ja
  - Nein [Sprung Ende]
- Wann wurde zum ersten Mal eine Infektion mit dem Coronavirus festgestellt?
- [Monat, Jahr]
- [Sprung Fragenblock - Reinfektion], wenn Monat < August 2020
- [Sprung Fragenblock - Erstinfektion], wenn Monat ≥ August 2020

### Fragenblock - Erstinfektion

- Hatten Sie Symptome aufgrund dieser Coronavirus-Infektion?
- Ja
  - Nein [Sprung Fragenblock - Reinfektion]
- Welche der folgenden Symptome hatten Sie aufgrund der Coronavirus-Infektion?
- |                                       | Ja | Nein |
|---------------------------------------|----|------|
| Atemnot                               |    |      |
| Fieber (Körpertemperatur über 38,5°C) |    |      |
| Husten                                |    |      |
| Gliederschmerzen                      |    |      |
| Halschmerzen                          |    |      |
| Geschmacks- und/oder Geruchsverlust   |    |      |
| Andere Symptome                       |    |      |
- Wurden Sie aufgrund der Coronavirus-Infektion stationär in einem Krankenhaus behandelt?
- Ja
  - Nein [Sprung Fragenblock - Reinfektion]
- Haben Sie zusätzlich Sauerstoff erhalten (z.B. über eine Nasenbrille)?
- Ja
  - Nein
- Wurden Sie in ein künstliches Koma versetzt und maschinell beatmet?
- Ja
  - Nein
- [Sprung Fragenblock - Reinfektion]

### Fragenblock - Reinfektion

- Wurden Sie seitdem (mindestens 2 Monate nach Erstinfektion) erneut positiv auf eine Infektion mit dem Coronavirus getestet?
- Ja
  - Nein [Sprung Fragenblock - Post COVID-19]
- Erfolgte dieser Test durch einen PCR-Test?
- Ja
  - Nein [Sprung Fragenblock - Post COVID-19]
- Wann wurde diese Infektion festgestellt
- [Monat, Jahr]
- Hatten Sie Symptome aufgrund dieser Coronavirus-Infektion?
- Ja
  - Nein [Sprung Fragenblock - Post COVID-19]
- Welche der folgenden Symptome hatten Sie aufgrund der Coronavirus-Infektion?
- |                                       | Ja | Nein |
|---------------------------------------|----|------|
| Atemnot                               |    |      |
| Fieber (Körpertemperatur über 38,5°C) |    |      |
| Husten                                |    |      |
| Gliederschmerzen                      |    |      |
| Halschmerzen                          |    |      |
| Geschmacks- und/oder Geruchsverlust   |    |      |
| Andere Symptome                       |    |      |
- Wurden Sie aufgrund der Coronavirus-Infektion stationär in einem Krankenhaus behandelt?
- Ja
  - Nein [Sprung Fragenblock - Longovid]
- Haben Sie zusätzlich Sauerstoff erhalten (z.B. über eine Nasenbrille)?
- Ja
  - Nein
- Wurden Sie in ein künstliches Koma versetzt und maschinell beatmet?
- Ja
  - Nein
- [Sprung Fragenblock - Post COVID-19]

### Fragenblock - Post COVID-19

- Haben Sie Beschwerden durch die Coronavirus-Infektion, die mehr als 3 Monate andauern haben oder immer noch andauern?
- Ja
  - Nein [Sprung Ende]
- Wie viele Wochen waren Sie in Folge eigener gesundheitlicher Probleme durch die Coronavirus-Infektion an der Ausübung Ihrer Arbeit/Tätigkeit gehindert?
- Sind Sie immer noch in Folge eigener gesundheitlicher Probleme durch die Coronavirus-Infektion an der Ausübung Ihrer Arbeit/Tätigkeit gehindert?
- Ja
  - Nein [Sprung Ende]
- Wie sehr sind Sie in grundlegenden Aktivitäten des täglichen Lebens beeinträchtigt?
- Beispiele: sich alleine Waschen, Anziehen, Essen und Trinken
- sehr stark
  - etwas
  - gar nicht
- Wie sehr sind Sie in weiteren Aktivitäten des täglichen Lebens beeinträchtigt?
- Beispiele: Essen vorbereiten, Einkaufen, Hausarbeit, Nutzung von Auto/Fahrrad oder öffentlichen Verkehrsmitteln
- sehr stark
  - etwas
  - gar nicht
- [ENDE]

Figure S1 - Questionnaire. All participants completed a standardized questionnaire to assess risk factors, their physical and psychological performance in comparison to the time before the COVID-19 pandemic, the occurrence of 20 potential post COVID-19 symptoms during the two weeks prior to the survey and reported their vaccination status and their infection status (Fragenblock - Risikofaktoren). Participants who reported a positive SARS-CoV-2 PCR test result after July 2020 were asked about symptoms during the acute phase of their infection (Fragenblock - Erstinfektion). Participants with a positive PCR test until July 2020 had reported their acute symptoms in the first survey. All COVID-19-positive participants were furthermore asked about reinfection (Fragenblock - Reinfektion) and long-term sequelae (Fragenblock - Post COVID-19).

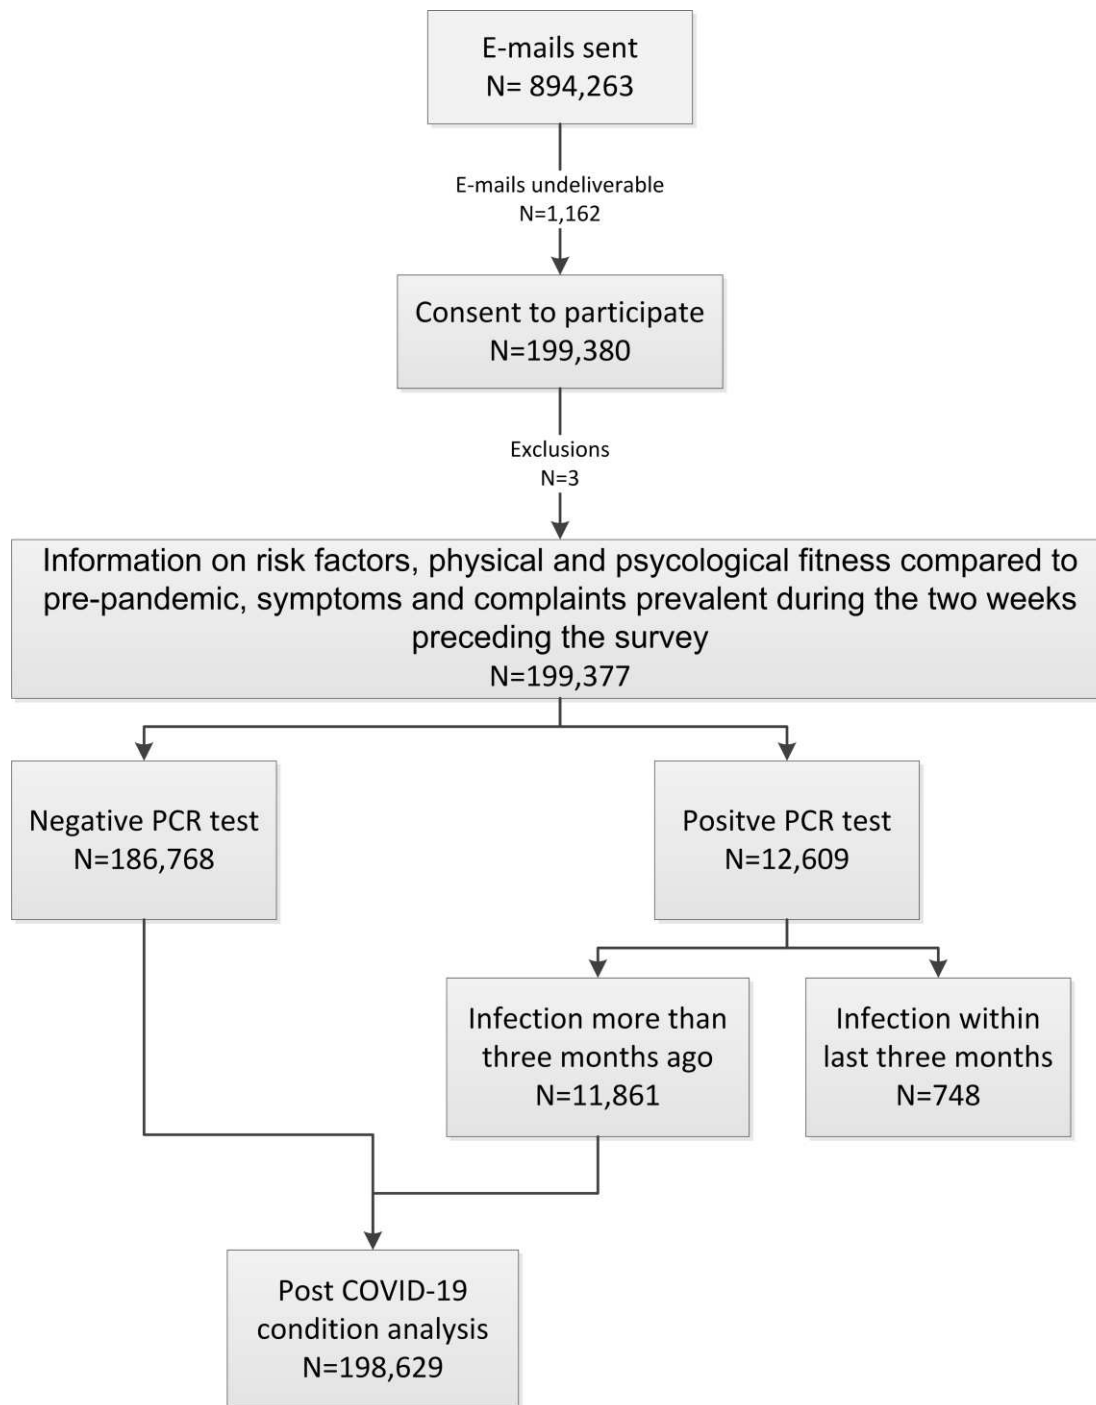

**Figure S2:** 894,263 e-mails were sent to registered stem cell donors; 1,162 e-mails could not be delivered due to reasons such as server unavailability or full e-mail inboxes. A total of 199,380 (22.2%) participants consented to study participation, 3 of whom had to be excluded due to a temporary problem with the database. 12,609 of the participants reported a PCR-confirmed infection with SARS-CoV-2, 11,861 of whom were infected at least three months prior to participation and were included in the post COVID-19 condition analysis.

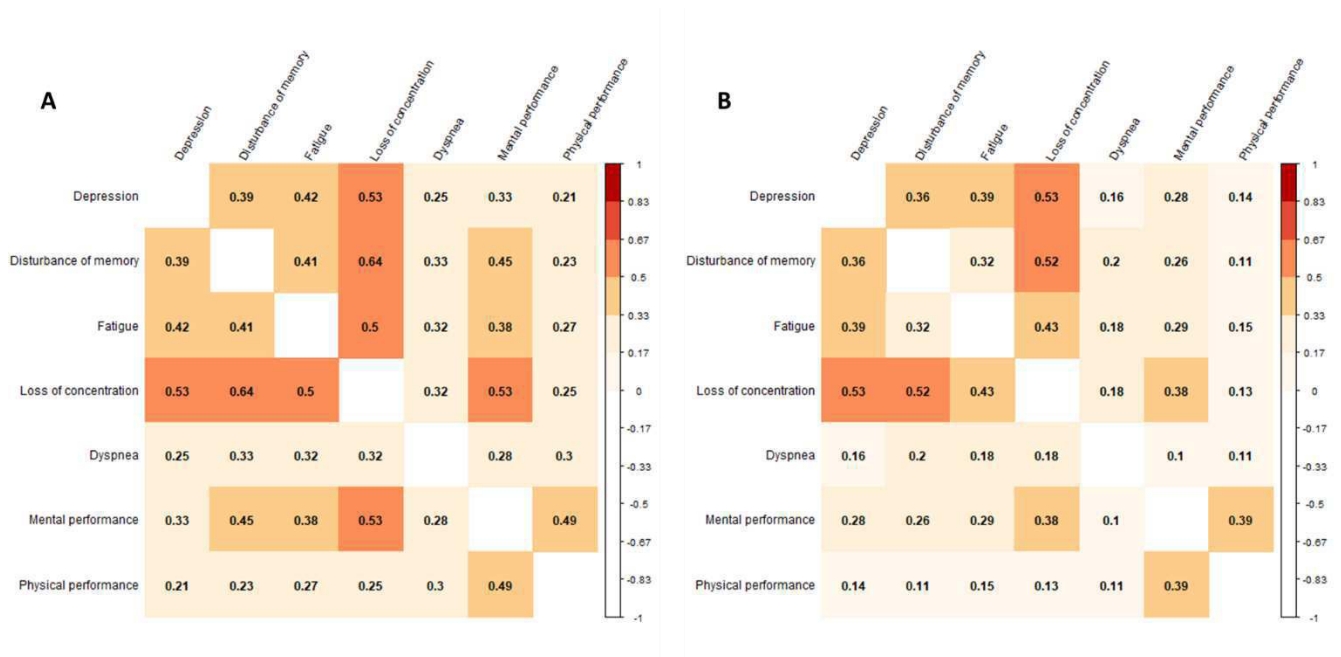

**Figure S3:** Correlations between low mental and physical performance ratings and daily occurrence of symptoms of the neuropsychiatric and pulmonary/cardiovascular clusters. A: cases, B: controls.
